# Supplementary material for: Formation, structure and electrochemical performance of nano-sized Li2FeSiO4/C synthesized with the co-incorporation of citric acid and glucose followed by a two-step annealing
Source: Royal Society of Chemistry journal article supplement (doi:10.1039/c4ra10677f), 2014-01-01
Supplement: c4ra10677f1.pdf [file c4ra10677f1.pdf]

## Supporting Information

### **Formation, structure and electrochemical performance of the nano-sized $\text{Li}_2\text{FeSiO}_4/\text{C}$ synthesized with the co - incorporation of citric acid and glucose followed by a two - step annealing**

L. Mi<sup>a</sup>, H. Q. Liu<sup>a</sup>, R. Y. Tian<sup>a</sup>, Y. Jiang<sup>a</sup>, L. N. Zhang<sup>b,c</sup>, X. H. Gu<sup>c</sup>, Y. J. Guo<sup>a</sup>, H. F. Wang<sup>a\*</sup>, L. F. Sun<sup>a\*</sup> and W. G. Chu<sup>a\*</sup>

**a National Center for Nanoscience and Technology of China, Beijing 100190, P. R. China**

**b. Department of Physics, Tsinghua University, Beijing 100084, P. R. China**

**c. Tsinghua-Foxconn Nanotechnology Research Center, Tsinghua University, Beijing 100084, P. R. China**

**\* Corresponding authors: Wei-guo Chu: [wgchu@nanoctr.cn](mailto:wgchu@nanoctr.cn); Han-fu Wang: [wanghf@nanoctr.cn](mailto:wanghf@nanoctr.cn); [slf@nanoctr.cn](mailto:slf@nanoctr.cn)**

**Table 1S. The atomic coordinates and occupancies derived from the Rietveld refinements for samples C3G8, C6G9, C6G10 and C9G7**

| Sample | Atoms  | Sites | x            | y            | z            | Occupancies     |
|--------|--------|-------|--------------|--------------|--------------|-----------------|
| C3G8   | Li1/Fe | 2a    | 0.68401 (56) | 0.93843 (43) | 0.65050 (44) | 1.000/0.000     |
|        | Li2/Fe | 2a    | 0.17671 (47) | 0.77220 (61) | 0.15518 (51) | 1.000/0.000     |
|        | Li3/Fe | 2a    | 0.55534 (53) | 0.45417 (50) | 0.08207 (61) | 0.874/0.126 (1) |
|        | Li4/Fe | 2a    | 0.08432 (66) | 0.40966 (56) | 0.58220 (43) | 0.959/0.041 (1) |
|        | Fe1/Li | 2a    | 0.29448 (30) | 0.90525 (28) | 0.53585 (32) | 0.781/0.219 (1) |
|        | Fe2/Li | 2a    | 0.79680 (28) | 0.80680 (31) | 0.04024 (37) | 0.830/0.170 (2) |
|        | Si1    | 2a    | 0.04777 (44) | 0.81019 (29) | 0.78773 (26) | 1.0             |
|        | Si2    | 2a    | 0.54511 (29) | 0.93054 (25) | 0.29111 (28) | 1.0             |
|        | O1     | 2a    | 0.87130 (35) | 0.89293 (35) | 0.83616 (33) | 1.0             |
|        | O2     | 2a    | 0.37684 (46) | 0.83800 (37) | 0.33356 (32) | 1.0             |
|        | O3     | 2a    | 0.43316 (53) | 0.30074 (51) | 0.90037 (45) | 1.0             |
|        | O4     | 2a    | 0.92727 (45) | 0.33138 (52) | 0.40302 (62) | 1.0             |
|        | O5     | 2a    | 0.66788 (29) | 0.78266 (35) | 0.44968 (54) | 1.0             |
|        | O6     | 2a    | 0.18555 (62) | 0.82558 (41) | 0.96246 (32) | 1.0             |
|        | O7     | 2a    | 0.95459 (47) | 0.96505 (34) | 0.21551 (39) | 1.0             |
|        | O8     | 2a    | 0.47116 (51) | 0.83112 (29) | 0.71467 (51) | 1.0             |

| Sample | Atoms  | Sites | x            | y            | z            | Occupancies     |
|--------|--------|-------|--------------|--------------|--------------|-----------------|
| C6G9   | Li1/Fe | 2a    | 0.66964 (52) | 0.90294 (35) | 0.66762 (58) | 0.987/0.013 (1) |
|        | Li2/Fe | 2a    | 0.17199 (42) | 0.82582 (48) | 0.16987 (50) | 0.970/0.030 (1) |
|        | Li3/Fe | 2a    | 0.55990 (51) | 0.48775 (32) | 0.07713 (53) | 0.842/0.158 (1) |
|        | Li4/Fe | 2a    | 0.08263 (55) | 0.32483 (45) | 0.57523 (69) | 0.928/0.072 (2) |
|        | Fe1/Li | 2a    | 0.29640 (27) | 0.90291 (17) | 0.54224 (23) | 0.538/0.462 (2) |
|        | Fe2/Li | 2a    | 0.79369 (21) | 0.82229 (20) | 0.04533 (23) | 0.644/0.356 (1) |
|        | Si1    | 2a    | 0.04035 (26) | 0.87438 (28) | 0.79357 (27) | 1.0             |
|        | Si2    | 2a    | 0.54223 (27) | 0.95746 (30) | 0.29260 (30) | 1.0             |
|        | O1     | 2a    | 0.83977 (43) | 0.96616 (45) | 0.86340 (43) | 1.0             |
|        | O2     | 2a    | 0.34312 (42) | 0.88576 (42) | 0.35082 (43) | 1.0             |
|        | O3     | 2a    | 0.42871 (53) | 0.32773 (39) | 0.88445 (60) | 1.0             |
|        | O4     | 2a    | 0.92394 (55) | 0.35033 (41) | 0.38320 (60) | 1.0             |
|        | O5     | 2a    | 0.66435 (45) | 0.76117 (53) | 0.46385 (41) | 1.0             |
|        | O6     | 2a    | 0.17944 (38) | 0.88508 (39) | 0.96048 (36) | 1.0             |
|        | O7     | 2a    | 0.95006 (61) | 0.87527 (56) | 0.22478 (74) | 1.0             |
|        | O8     | 2a    | 0.45910 (55) | 0.77689 (54) | 0.72254 (63) | 1.0             |

| Sample | Atoms  | Sites | x            | y            | z            | Occupancies     |
|--------|--------|-------|--------------|--------------|--------------|-----------------|
| C6G10  | Li1/Fe | 2a    | 0.66458 (54) | 0.92168 (51) | 0.66435 (40) | 0.977/0.023 (2) |
|        | Li2/Fe | 2a    | 0.16958 (43) | 0.82844 (52) | 0.16651 (60) | 0.953/0.047 (2) |
|        | Li3/Fe | 2a    | 0.56125 (48) | 0.48208 (57) | 0.08206 (51) | 0.820/0.180 (1) |
|        | Li4/Fe | 2a    | 0.08536 (61) | 0.32820 (39) | 0.57593 (49) | 0.904/0.096 (2) |
|        | Fe1/Li | 2a    | 0.29748 (31) | 0.90318 (27) | 0.54365 (29) | 0.503/0.497 (1) |
|        | Fe2/Li | 2a    | 0.79633 (23) | 0.81896 (34) | 0.04632 (31) | 0.595/0.405 (1) |
|        | Si1    | 2a    | 0.04487 (29) | 0.85836 (33) | 0.78846 (34) | 1.0             |
|        | Si2    | 2a    | 0.54033 (26) | 0.94394 (29) | 0.29714 (31) | 1.0             |
|        | O1     | 2a    | 0.83956 (35) | 0.97024 (45) | 0.86262 (29) | 1.0             |
|        | O2     | 2a    | 0.34110 (56) | 0.89494 (55) | 0.35667 (39) | 1.0             |
|        | O3     | 2a    | 0.42664 (44) | 0.34113 (51) | 0.88978 (57) | 1.0             |
|        | O4     | 2a    | 0.92475 (39) | 0.34614 (39) | 0.38348 (61) | 1.0             |
|        | O5     | 2a    | 0.66784 (60) | 0.76875 (34) | 0.46723 (38) | 1.0             |
|        | O6     | 2a    | 0.18207 (58) | 0.88790 (50) | 0.96354 (51) | 1.0             |
|        | O7     | 2a    | 0.95061 (47) | 0.87134 (32) | 0.22665 (51) | 1.0             |
|        | O8     | 2a    | 0.45626 (33) | 0.76898 (39) | 0.72044 (43) | 1.0             |

| Sample | Atoms  | Sites | x            | y            | z            | Occupancies     |
|--------|--------|-------|--------------|--------------|--------------|-----------------|
| C9G7   | Li1/Fe | 2a    | 0.67601 (56) | 0.86818 (47) | 0.66680 (60) | 0.895/0.105 (3) |
|        | Li2/Fe | 2a    | 0.18729 (45) | 0.71513 (55) | 0.15530 (34) | 0.871/0.129 (3) |
|        | Li3/Fe | 2a    | 0.57236 (38) | 0.43241 (41) | 0.08782 (33) | 0.905/0.095 (2) |
|        | Li4/Fe | 2a    | 0.09629 (60) | 0.32583 (44) | 0.58683 (41) | 0.875/0.125 (1) |
|        | Fe1/Li | 2a    | 0.29338 (29) | 0.87898 (31) | 0.54109 (34) | 0.483/0.517 (2) |
|        | Fe2/Li | 2a    | 0.78764 (33) | 0.82107 (30) | 0.04648 (31) | 0.448/0.552 (1) |
|        | Si1    | 2a    | 0.03982 (28) | 0.86889 (34) | 0.79776 (29) | 1.0             |
|        | Si2    | 2a    | 0.54162 (34) | 0.94474 (21) | 0.29208 (32) | 1.0             |
|        | O1     | 2a    | 0.80566 (45) | 0.94538 (35) | 0.86058 (44) | 1.0             |
|        | O2     | 2a    | 0.32279 (50) | 0.95859 (39) | 0.34810 (34) | 1.0             |
|        | O3     | 2a    | 0.40793 (34) | 0.31315 (50) | 0.86053 (47) | 1.0             |
|        | O4     | 2a    | 0.91490 (46) | 0.37756 (34) | 0.37897 (53) | 1.0             |
|        | O5     | 2a    | 0.66210 (46) | 0.71793 (43) | 0.44570 (42) | 1.0             |
|        | O6     | 2a    | 0.18538 (32) | 0.87095 (23) | 0.96444 (36) | 1.0             |
|        | O7     | 2a    | 0.94054 (61) | 0.85582 (51) | 0.21118 (54) | 1.0             |
|        | O8     | 2a    | 0.44650 (52) | 0.76517 (44) | 0.71230 (38) | 1.0             |

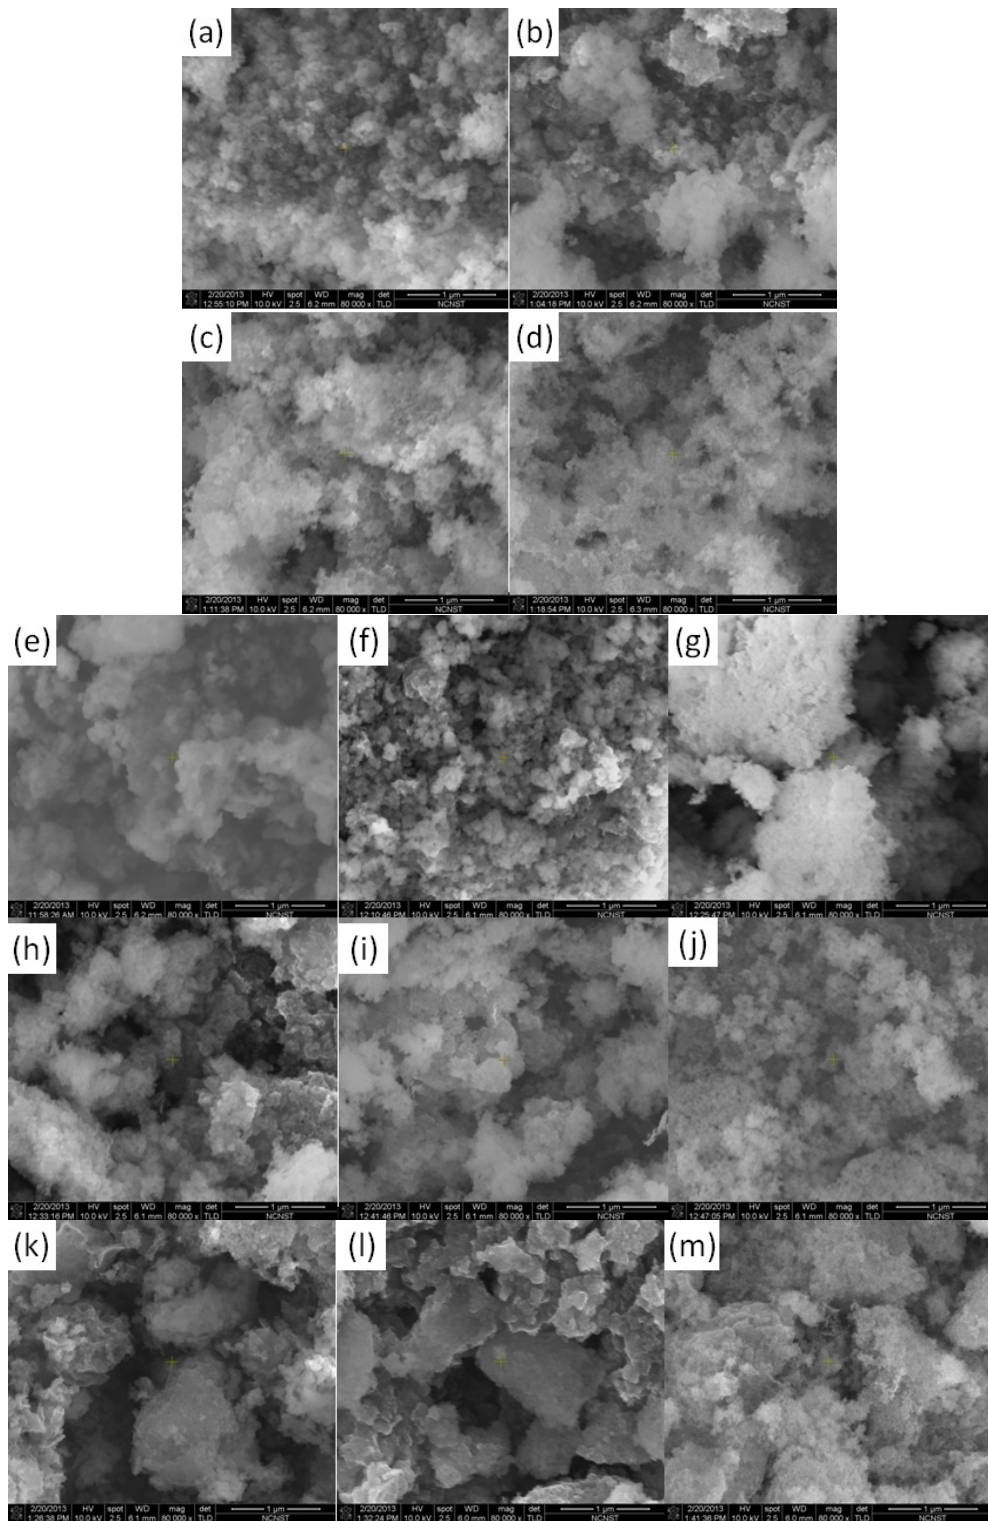

**Figure 1S. SEM images of samples C3G8 (a), C3G9 (b), C3G10 (c), C3G11 (d), C6G5 (e), C6G6 (f), C6G7 (g), C6G8 (h), C6G9 (i), C6G10 (j), C9G5 (k), C9G6 (l) and C9G7 (m)**

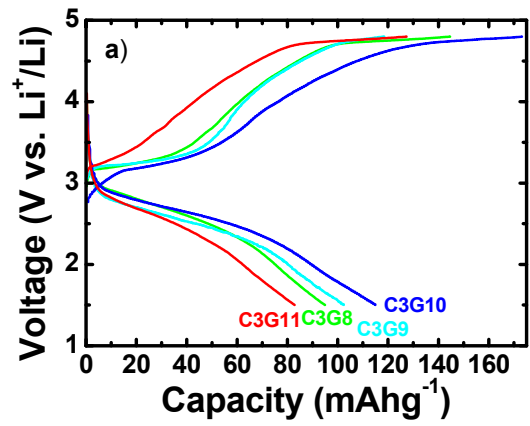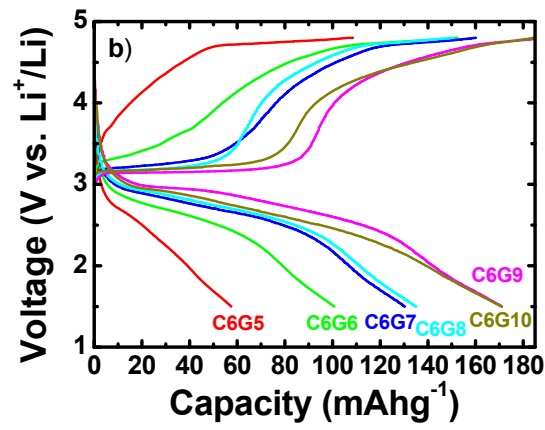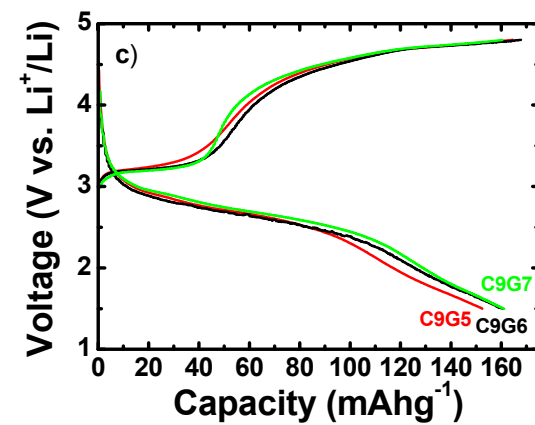

Figure 2S. Initial charge/discharge curves of samples C3G8, C3G9, C3G10, and C3G11 (a), C6G5, C6G6, C6G7, C8G8, C6G9, and C6G10 (b), C9G5, C9G6, and C9G7 (c) at 0.1 C rate and over the potential of 1.5 – 4.8 V
